# Supplementary material for: Novel Polymerase Gene Mutations for Human Adaptation in Clinical Isolates of Avian H5N1 Influenza Viruses
Source: PubMed Central journal article supplement (PMC4838241; doi:10.1371/journal.ppat.1005583), 2016-04-20

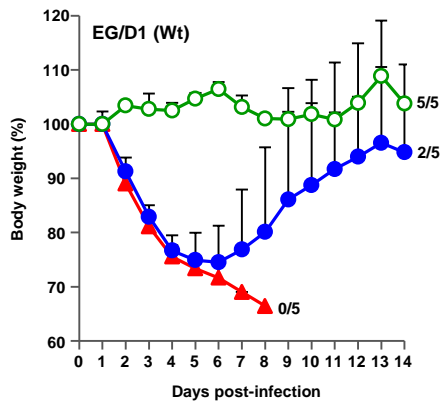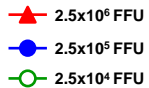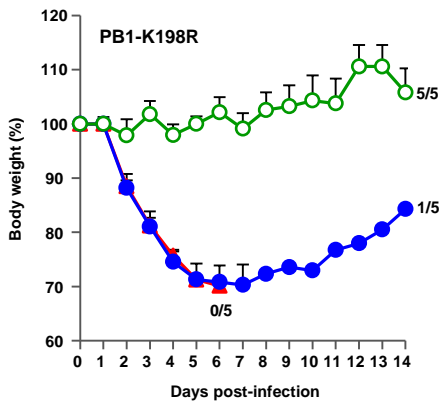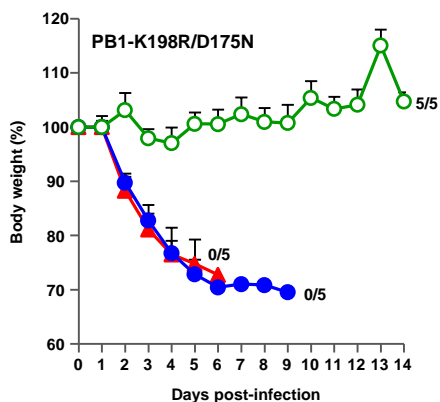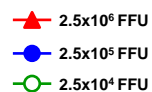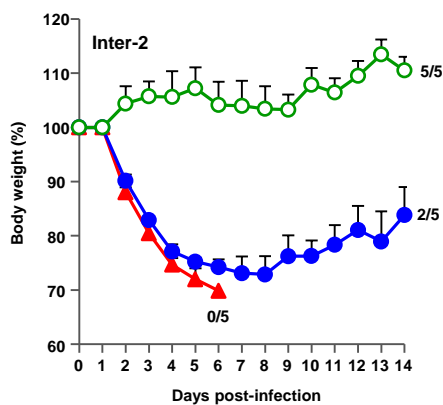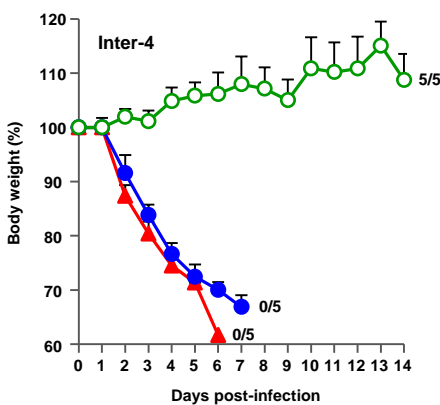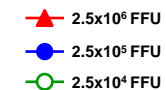

Supplement: ppat.1005583.s008.pdf [file ppat.1005583.s008.pdf]
