# Supplementary material for: Novel Polymerase Gene Mutations for Human Adaptation in Clinical Isolates of Avian H5N1 Influenza Viruses
Source: PubMed Central journal article supplement (PMC4838241; doi:10.1371/journal.ppat.1005583), 2016-04-20
Supplement: ppat.1005583.s013.pdf [file ppat.1005583.s013.pdf]

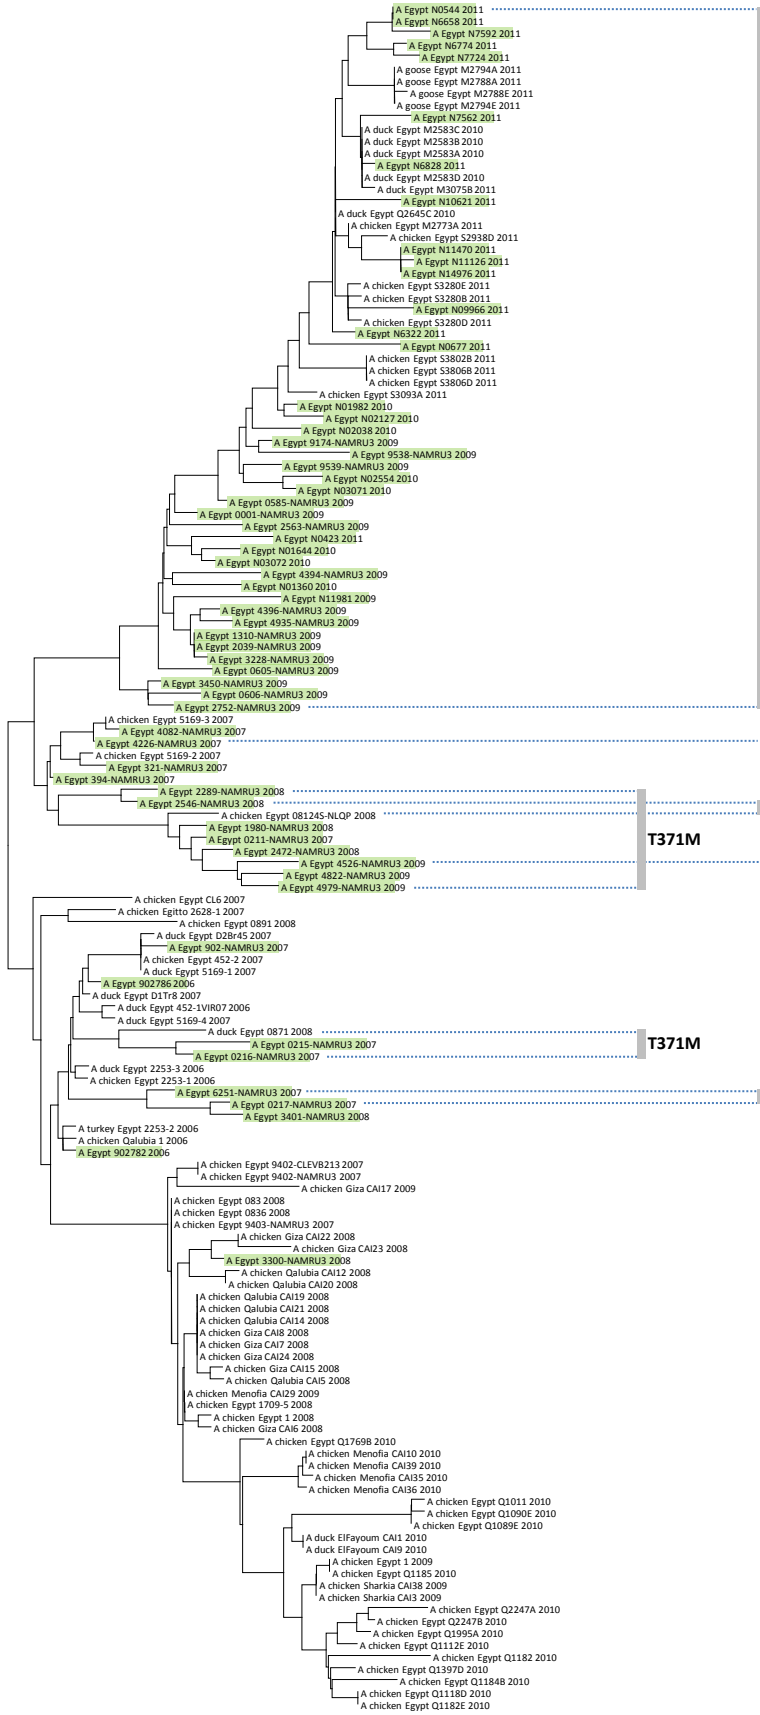

G2875

Clade 2.2.1.2  
(Clade 2.2.1-C)

G2875

Clade 2.2.1-B

T371M

G2875

Ancestral clade 2.2.1

T371M

G2875

Clade 2.2.1-D

Ancestral clade 2.2.1

Clade 2.2.1.1

0.002
