# Supplementary material for: Novel Polymerase Gene Mutations for Human Adaptation in Clinical Isolates of Avian H5N1 Influenza Viruses
Source: PubMed Central journal article supplement (PMC4838241; doi:10.1371/journal.ppat.1005583), 2016-04-20
Supplement: ppat.1005583.s014.pdf [file ppat.1005583.s014.pdf]

**S1 Table. Identified mutations in the polymerase sequences of the 61 H5N1 viruses isolated from Egyptian patients by database search.**

| Clade | Virus Strain             | Subtype | Passage history <sup>†</sup> | Host  | Collection date | Host age       | Host gender    | Mutations in gene <sup>*</sup>     |     |                                           |    |                                           |             |
|-------|--------------------------|---------|------------------------------|-------|-----------------|----------------|----------------|------------------------------------|-----|-------------------------------------------|----|-------------------------------------------|-------------|
|       |                          |         |                              |       |                 |                |                | PB2                                | PB1 | PA                                        | NP |                                           |             |
| 2.2.1 | A/Egypt/902782/2006      | H5N1    |                              | Human | 2006            | U <sup>‡</sup> | U <sup>‡</sup> |                                    |     |                                           |    |                                           |             |
| 2.2.1 | A/Egypt/902786/2006      | H5N1    |                              | Human | 2006            | U <sup>‡</sup> | U <sup>‡</sup> | M570I                              |     |                                           |    |                                           |             |
| 2.2.1 | A/Egypt/394-NAMRU3/2007  | H5N1    | E1                           | Human | 2007-02-05      | 17             | Female         | M570I/K80R/T129N                   |     | T182I/K214R                               |    | N321S                                     |             |
| 2.2.1 | A/Egypt/321-NAMRU3/2007  | H5N1    | E1                           | Human | 2007-03-13      | U <sup>‡</sup> | U <sup>‡</sup> | M473V                              |     | T182I/K214R                               |    | N321S/T608S                               |             |
| 2.2.1 | A/Egypt/902-NAMRU3/2007  | H5N1    | E1                           | Human | 2007-02-28      | U <sup>‡</sup> | U <sup>‡</sup> |                                    |     |                                           |    |                                           |             |
| 2.2.1 | A/Egypt/4226-NAMRU3/2007 | H5N1    | C1E1/E1                      | Human | 2007-06-21      | 4              | Female         | M473V                              |     | T182I/K214R/M616R/P756S/P627L/E618D/N642K |    | N321S/E629H/G631C                         | G287S       |
| 2.2.1 | A/Egypt/4082-NAMRU3/2007 | H5N1    | E2/E1                        | Human | 2007-06-10      | 4              | Female         | M473V                              |     | T182I/K214R/M616R/P756S/P627L/N642K       |    | N321S                                     |             |
| 2.2.1 | A/Egypt/6251-NAMRU3/2007 | H5N1    | C1/E2                        | Human | 2007-07-21      | 25             | Female         | K617E                              |     | M616R/P756S/P627L/E618D/N642K             |    | E629H                                     | G287S       |
| 2.2.1 | A/Egypt/0211-NAMRU3/2007 | H5N1    | E1/E1                        | Human | 2007-12-24      | 25             | Female         |                                    |     | T182I/K214R/M616R/P756S/P627L/E618D/N642K |    | N321S/E629H/G631C/A669V                   | T371M       |
| 2.2.1 | A/Egypt/0215-NAMRU3/2007 | H5N1    | E3/E1                        | Human | 2007-12-26      | 22             | Female         |                                    |     | M616R/P756S/P627L/E618D/N642K/K386R       |    | E629H/G631C                               | T371M       |
| 2.2.1 | A/Egypt/0216-NAMRU3/2007 | H5N1    | E2/E1                        | Human | 2007-12-29      | 36             | Female         |                                    |     | M616R/P627L/E618D/N642K/K386R             |    | E629H/G631C/A669V/V341L                   | T371M       |
| 2.2.1 | A/Egypt/0217-NAMRU3/2007 | H5N1    | E2/E1                        | Human | 2007-12-29      | 30             | Female         |                                    |     | M616R/P756S/N642K/K386R                   |    | E629H/G631C                               | G287S       |
| 2.2.1 | A/Egypt/1980-NAMRU3/2008 | H5N1    | E1/E1                        | Human | 2008-02-26      | 4              | Female         | M570I/M473V                        |     | T182I/K214R                               |    | N321S/T608S/F681L                         | T371M       |
| 2.2.1 | A/Egypt/2289-NAMRU3/2008 | H5N1    | E1/E1                        | Human | 2008-03-02      | 25             | Female         | M570I/K80R/T129N/D195N/R299K       |     | T182I/K214R                               |    | N321S/G631C/L641P                         | T371M       |
| 2.2.1 | A/Egypt/2546-NAMRU3/2008 | H5N1    | C1/E1                        | Human | 2008-03-08      | 8              | Male           | M570I/K80R/T129N/D195N/R299K/N456D |     | T182I/K214R                               |    | N321S/T608S                               | G287S/T371M |
| 2.2.1 | A/Egypt/2472-NAMRU3/2008 | H5N1    | C1/E1                        | Human | 2008            | 19             | Male           | N456D/M473V                        |     | T182I/K214R                               |    | N321S/G631C/L641P                         | T371M       |
| 2.2.1 | A/Egypt/3300-NAMRU3/2008 | H5N1    | C1/C1                        | Human | 2008-04-11      | 30             | Female         |                                    |     |                                           |    |                                           |             |
| 2.2.1 | A/Egypt/3401-NAMRU3/2008 | H5N1    | C1/C1                        | Human | 2008-04-16      | 2              | Male           |                                    |     | K386R                                     |    |                                           |             |
| 2.2.1 | A/Egypt/0605-NAMRU3/2009 | H5N1    | C1E1/E1                      | Human | 2009-02-03      | 2              | Male           | M570I/K80R/I292M                   |     | T182I/K214R/L384S/K198R                   |    | N321S/S400T/K615R/D55N/L641P/S644F/F681L  | G287S       |
| 2.2.1 | A/Egypt/0606-NAMRU3/2009 | H5N1    | E2/E1                        | Human | 2009-02-07      | 1.5            | Male           | M570I/K80R/T129N/K617E             |     | T182I/K214R/L384S/K198R/D175N             |    | N321S/K615R/L641P/S644F/F681L             | G287S       |
| 2.2.1 | A/Egypt/1310-NAMRU3/2009 | H5N1    | E1/E1                        | Human | 2009-02-28      | 2              | Male           | M570I/K80R/T129N/I292M/I463M       |     | T182I/K214R/L384S/K198R                   |    | N321S/S400T/K615R/E327K/L641P/S644F/F681L | G287S       |
| 2.2.1 | A/Egypt/2039-NAMRU3/2009 | H5N1    | C1/E1                        | Human | 2009-03-03      | 2.5            | Male           | M570I/K80R/T129N/I292M/I463M       |     | T182I/K214R/L384S/K198R                   |    | N321S/S400T/K615R/E327K/L641P/S644F/F681L | G287S       |
| 2.2.1 | A/Egypt/0001-NAMRU3/2009 | H5N1    | C1/E1                        | Human | 2009-01-01      | 1              | Female         | M570I/K80R/T129N/I292M/K617E       |     | T182I/K214R/L384S/K198R                   |    | N321S/S400T/K615R/D55N/L641P/S644F/F681L  | G287S       |
| 2.2.1 | A/Egypt/0585-NAMRU3/2009 | H5N1    | C1/E1                        | Human | 2009-01-23      | 2              | Female         | M570I/K80R/T129N/I292M             |     | T182I/K214R/L384S                         |    | N321S/S400T                               | G287S       |
| 2.2.1 | A/Egypt/9538-NAMRU3/2009 | H5N1    | E1/E1                        | Human | 2009-05-18      | U <sup>‡</sup> | U <sup>‡</sup> | M570I/K80R/T129N/I292M             |     | T182I/K214R/L384S                         |    | N321S/S400T/K615R/K716N                   | G287S       |
| 2.2.1 | A/Egypt/4526-NAMRU3/2009 | H5N1    | E1/E1                        | Human | 2009-05-18      | 4              | Male           | D195N/M473V/T683I                  |     | T182I/K214R                               |    | N321S/K716N/L649I/A669V                   | G287S/T371M |
| 2.2.1 | A/Egypt/9539-NAMRU3/2009 | H5N1    | E1/E1                        | Human | 2009-09-16      | 13             | Male           | K80R/T129N/I292M/Q257L             |     | T182I/K214R/L384S                         |    | N321S/S400T/K615R/K716N                   | G287S       |
| 2.2.1 | A/Egypt/9174-NAMRU3/2009 | H5N1    | E1/E1                        | Human | 2009-08-26      | 1              | Female         | M570I/K80R/T129N/I292M             |     | T182I/K214R/L384S                         |    | N321S/S400T/K615R/K716N                   | G287S       |
| 2.2.1 | A/Egypt/4822-NAMRU3/2009 | H5N1    | E1/E1                        | Human | 2009-05-25      | 4              | Female         | D195N/M473V/T683I                  |     | T182I/K214R                               |    | N321S/K716N/L649I/A669V                   | T371M       |
| 2.2.1 | A/Egypt/4979-NAMRU3/2009 | H5N1    | C1/C1                        | Human | 2009-05-31      | 4              | Female         | D195N/M473V/T683I                  |     | T182I/K214R                               |    | N321S/K716N/L649I/A669V                   | T371M       |
| 2.2.1 | A/Egypt/4935-NAMRU3/2009 | H5N1    | E1/E1                        | Human | 2009-05-13      | 3              | Male           | M570I/K80R/T129N/I292M/I463M       |     | T182I/K214R/L384S/K198R                   |    | N321S/S400T/K615R/K716N/E327K             | G287S       |
| 2.2.1 | A/Egypt/2752-NAMRU3/2009 | H5N1    | E1/E1                        | Human | 2009-03-24      | 2              | Female         | M570I/K80R/T129N/Q257L             |     | T182I/K214R/L384S/K198R                   |    | N321S/K716N                               | G287S       |
| 2.2.1 | A/Egypt/2563-NAMRU3/2009 | H5N1    | C1/C1                        | Human | 2009-03-14      | 38             | Female         | M570I/K80R/T129N/I292M             |     | T182I/K214R/L384S/D175N                   |    | N321S/S400T/K615R/K716N                   | G287S       |
| 2.2.1 | A/Egypt/3228-NAMRU3/2009 | H5N1    | E1                           | Human | 2009-03-30      | 2              | Male           | M570I/K80R/T129N/I292M/I463M       |     | T182I/K214R/L384S/K198R                   |    | N321S/S400T/K615R/K716N/E327K             | G287S       |
| 2.2.1 | A/Egypt/4396-NAMRU3/2009 | H5N1    | E1/E1                        | Human | 2009-05-17      | 4              | Female         | M570I/K80R/T129N/I292M             |     | T182I/K214R/L384S/K198R                   |    | N321S/S400T/K615R/K716N/V341L             | G287S       |
| 2.2.1 | A/Egypt/4394-NAMRU3/2009 | H5N1    | E1/E1                        | Human | 2009-05-11      | 3              | Male           | M570I/K80R/T129N/I292M             |     | T182I/K214R/L384S/A374T                   |    | N321S/S400T/K615R/K716N/V341L             | G287S       |
| 2.2.1 | A/Egypt/3450-NAMRU3/2009 | H5N1    | C1/C1                        | Human | 2009-04-19      | 4              | Male           | M570I/K80R/T129N/Q257L             |     | T182I/K214R/L384S/D175N/A374T             |    | N321S/K716N/A669V                         | G287S       |
| 2.2.1 | A/Egypt/N11981/2009      | H5N1    | E2/E1                        | Human | 2009-11-22      | 3              | Male           | M570I/K80R/T129N/I292M/I463M       |     | T182I/K214R/L384S/K198R                   |    | N321S/S400T/K615R/K716N                   | G287S       |
| 2.2.1 | A/Egypt/N01360/2010      | H5N1    | C1/C1                        | Human | 2010-02-02      | 40             | Female         | M570I/K80R/T129N/I292M/R299K       |     | T182I/K214R/L384S/K198R                   |    | N321S/S400T/K615R/K716N/E382D/A669V       | G287S       |
| 2.2.1 | A/Egypt/N01644/2010      | H5N1    | E1/E1                        | Human | 2010-02-07      | 37             | Male           | M570I/K80R/T129N/I292M             |     | T182I/K214R/L384S/K198R                   |    | N321S/S400T/K615R/K716N/D55N/E382D        | G287S       |
| 2.2.1 | A/Egypt/N01982/2010      | H5N1    | E1/E1                        | Human | 2010-02-12      | 30             | Female         | M570I/K80R/T129N/I292M             |     | T182I/K214R/L384S                         |    | N321S/S400T/K615R/K716N                   | G287S       |
| 2.2.1 | A/Egypt/N02038/2010      | H5N1    | E2/E1                        | Human | 2010-02-15      | 10             | Male           | M570I/K80R/T129N/I292M             |     | T182I/K214R/L384S/A374T                   |    | S400T/K615R/K716N/N321I                   | G287S       |
| 2.2.1 | A/Egypt/N02127/2010      | H5N1    | E1/E1                        | Human | 2010-02-13      | 30             | Female         | M570I/K80R/I292M                   |     | T182I/K214R/L384S                         |    | N321S/S400T/K615R/K716N                   | G287S       |
| 2.2.1 | A/Egypt/N02554/2010      | H5N1    | E1/E2                        | Human | 2010-02-23      | 1              | Male           | M570I/K80R/T129N/I292M             |     | T182I/K214R/L384S                         |    | K615R/K716N/N321I                         | G287S       |
| 2.2.1 | A/Egypt/N03071/2010      | H5N1    | E2/E1                        | Human | 2010-03-03      | 1              | Male           | M570I/K80R/T129N                   |     | T182I/K214R/L384S                         |    | K615R/K716N/N321I                         | G287S       |
| 2.2.1 | A/Egypt/N03072/2010      | H5N1    | E2/E1                        | Human | 2010-03-07      | 20             | Female         | M570I/K80R/T129N/I292M/N456D       |     | T182I/K214R/L384S/K198R                   |    | N321S/S400T/K615R/K716N/D55N/E382D        | G287S       |
| 2.2.1 | A/Egypt/N0544/2011       | H5N1    | E3                           | Human | 2011            | 7              | Male           | M570I/K80R/T129N/I292M/R389K       |     | T182I/K214R/L384S                         |    | N321S/S400T/K615R/K716N                   | G287S       |
| 2.2.1 | A/Egypt/N6322/2011       | H5N1    | E2                           | Human | 2011            | 4              | Male           | M570I/K80R/T129N/I292M/R389K       |     | T182I/K214R/L384S                         |    | N321S/S400T/K615R/K716N                   | G287S       |
| 2.2.1 | A/Egypt/N6658/2011       | H5N1    | E2                           | Human | 2011            | 4              | Male           | M570I/K80R/T129N/I292M/R389K       |     | T182I/K214R/L384S                         |    | N321S/S400T/K615R/K716N                   | G287S       |
| 2.2.1 | A/Egypt/N0677/2011       | H5N1    | E2                           | Human | 2011            | 1              | Male           | M570I/K80R/T129N/I292M             |     | T182I/K214R/L384S                         |    | N321S/S400T/K615R/K716N                   | G287S       |
| 2.2.1 | A/Egypt/N6774/2011       | H5N1    | E1                           | Human | 2011            | 30             | Female         | M570I/K80R/T129N/I292M/R389K       |     | T182I/K214R/L384S                         |    | N321S/S400T/K615R/K716N                   | G287S       |
| 2.2.1 | A/Egypt/N6828/2011       | H5N1    | E3                           | Human | 2011            | 1              | Male           | M570I/K80R/T129N/I292M             |     | T182I/K214R/L384S                         |    | N321S/S400T/K615R/K716N                   | G287S       |
| 2.2.1 | A/Egypt/N0423/2011       | H5N1    | E3                           | Human | 2011            | 40             | Female         | M570I/K80R/T129N/I292M             |     | T182I/K214R/L384S/K198R                   |    | N321S/S400T/K615R/K716N/D55N/E382D        | G287S       |
| 2.2.1 | A/Egypt/N7562/2011       | H5N1    | E3                           | Human | 2011            | 21             | Female         | M570I/K80R/T129N/I292M             |     | T182I/K214R/L384S                         |    | N321S/S400T/K615R                         | G287S       |
| 2.2.1 | A/Egypt/N7592/2011       | H5N1    | E2                           | Human | 2011            | 31             | Male           | M570I/K80R/T129N/I292M/R389K       |     | T182I/K214R/L384S                         |    | N321S/S400T/K615R/K716N                   | G287S       |
| 2.2.1 | A/Egypt/N7724/2011       | H5N1    | E2                           | Human | 2011            | 27             | Male           | M570I/K80R/T129N/I292M/R389K       |     | T182I/K214R/L384S                         |    | N321S/S400T/K615R/K716N                   | G287S       |
| 2.2.1 | A/Egypt/N09966/2011      | H5N1    | E1                           | Human | 2011-09-21      | 1              | Male           | M570I/K80R/T129N/I292M             |     | T182I/K214R/L384S                         |    | N321S/S400T/K615R/K716N                   | G287S       |
| 2.2.1 | A/Egypt/N11126/2011      | H5N1    | E1                           | Human | 2011-12-01      | 21             | Female         | M570I/K80R/T129N/I292M/T637I       |     | T182I/K214R/L384S/K54R/A374T              |    | N321S/S400T/K615R/K716N                   | G287S       |
| 2.2.1 | A/Egypt/N11470/2011      | H5N1    | E1                           | Human | 2011-12-15      | 29             | Male           | M570I/K80R/T129N/I292M/T637I       |     | T182I/K214R/L384S/K54R/A374T              |    | N321S/S400T/K615R/K716N                   | G287S       |
| 2.2.1 | A/Egypt/N14976/2011      | H5N1    | E2                           | Human | 2011-12-21      | 42             | Male           | M570I/K80R/T129N/I292M/T637I       |     | T182I/K214R/L384S/K54R/A374T              |    | N321S/S400T/K615R/K716N                   | G287S       |
| 2.2.1 | A/Egypt/N10621/2011      | H5N1    | E1                           | Human | 2011-10-30      | 2              | Female         | M570I/T129N/I292M                  |     | T182I/K214R/L384S                         |    | N321S/S400T/K615R/K716N                   | G287S       |

<sup>†</sup>C, cultured cells; E, eggs

<sup>‡</sup>U, unkown

<sup>\*</sup>Mutations were identified by comparing each gene sequence to the clade 2.2.1 consensus sequence.
