# Supplementary material for: Novel Polymerase Gene Mutations for Human Adaptation in Clinical Isolates of Avian H5N1 Influenza Viruses
Source: PubMed Central journal article supplement (PMC4838241; doi:10.1371/journal.ppat.1005583), 2016-04-20
Supplement: ppat.1005583.s015.pdf [file ppat.1005583.s015.pdf]

**S2 Table. Prevalence of the clade 2.2.1 virus polymerase and NP mutations identified in the database search in this study.**

| Gene (no. of mutations) | Category of mutation                                  | Mutation  | % of strains with mutation (no. of strains) |                           |
|-------------------------|-------------------------------------------------------|-----------|---------------------------------------------|---------------------------|
|                         |                                                       |           | Human viruses <sup>a</sup>                  | Bird viruses <sup>a</sup> |
| PB2 (14)                | Only in human viruses                                 | Q257L     | 4.9 (3)                                     | 0 (0)                     |
|                         |                                                       | R299K     | 4.9 (3)                                     | 0 (0)                     |
|                         |                                                       | N456D     | 4.9 (3)                                     | 0 (0)                     |
|                         |                                                       | I463M     | 8.2 (5)                                     | 0 (0)                     |
|                         |                                                       | K617E     | 4.9 (3)                                     | 0 (0)                     |
|                         |                                                       | T637I     | 4.9 (3)                                     | 0 (0)                     |
|                         |                                                       | T683I     | 4.9 (3)                                     | 0 (0)                     |
|                         | More prevalent in human viruses than in avian viruses | K80R      | 68.9 (42)                                   | 20.9 (19)                 |
|                         |                                                       | T129N     | 67.2 (41)                                   | 20.9 (19)                 |
|                         |                                                       | D195N     | 8.2 (5)                                     | 1.1 (1)                   |
|                         |                                                       | I292M     | 59.0 (36)                                   | 20.9 (19)                 |
|                         |                                                       | R389K     | 9.8 (6)                                     | 1.1 (1)                   |
|                         |                                                       | M473V     | 13.1 (8)                                    | 3.3 (3)                   |
| M570I                   | 72.1 (44)                                             | 47.3 (43) |                                             |                           |
| PB1 (13)                | Only in human viruses                                 | K54R      | 4.9 (3)                                     | 0 (0)                     |
|                         |                                                       | D175N     | 4.9 (3)                                     | 0 (0)                     |
|                         |                                                       | K198R     | 23.0 (14)                                   | 0 (0)                     |
|                         |                                                       | A374T     | 9.8 (6)                                     | 0 (0)                     |
|                         |                                                       | M616R     | 11.5 (7)                                    | 0 (0)                     |
|                         |                                                       | E618D     | 8.2 (5)                                     | 0 (0)                     |
|                         |                                                       | P627L     | 11.5 (7)                                    | 0 (0)                     |
|                         |                                                       | N642K     | 11.5 (7)                                    | 0 (0)                     |
|                         | P756S                                                 | 9.8 (6)   | 0 (0)                                       |                           |
|                         | More prevalent in human viruses than in avian viruses | T182I     | 85.2 (52)                                   | 28.2 (22)                 |
| K214R                   |                                                       | 85.2 (52) | 28.2 (22)                                   |                           |
| PA (17)                 | Only in human viruses                                 | L384S     | 65.5 (40)                                   | 24.4 (19)                 |
|                         |                                                       | K386R     | 6.6 (4)                                     | 1.3 (1)                   |
|                         |                                                       | D55N      | 8.2 (5)                                     | 0 (0)                     |
|                         |                                                       | N321I     | 4.9 (3)                                     | 0 (0)                     |
|                         |                                                       | E327K     | 6.6 (4)                                     | 0 (0)                     |
|                         |                                                       | V341L     | 4.9 (3)                                     | 0 (0)                     |
|                         |                                                       | E382D     | 6.6 (4)                                     | 0 (0)                     |
|                         |                                                       | T608S     | 4.9 (3)                                     | 0 (0)                     |
|                         |                                                       | E629H     | 9.8 (6)                                     | 0 (0)                     |
|                         |                                                       | G631C     | 11.5 (7)                                    | 0 (0)                     |
|                         |                                                       | L641P     | 11.5 (7)                                    | 0 (0)                     |
|                         | S644F                                                 | 8.2 (5)   | 0 (0)                                       |                           |
|                         | L649I                                                 | 4.9 (3)   | 0 (0)                                       |                           |
|                         | A669V                                                 | 11.5 (7)  | 0 (0)                                       |                           |
|                         | F681L                                                 | 9.8 (6)   | 0 (0)                                       |                           |
|                         | More prevalent in human viruses than in avian viruses | N321S     | 80.3 (49)                                   | 29.5 (23)                 |
|                         |                                                       | S400T     | 57.4 (35)                                   | 25.6 (20)                 |
| K615R                   |                                                       | 60.7 (37) | 24.4 (19)                                   |                           |
| K716N                   |                                                       | 67.2 (41) | 28.2 (22)                                   |                           |
| NP (2)                  | More prevalent in human viruses than in avian viruses | G287S     | 73.8 (45)                                   | 24.7 (20)                 |
|                         |                                                       | T371M     | 16.4 (10)                                   | 2.5 (2)                   |

<sup>a</sup> For human viruses there were 61 PB2, PB1, PA and NP sequences, and for avian viruses there were 91 PB2, 78 PB1, 78 PA and 81 NP sequences.
