# Supplementary material for: Novel Polymerase Gene Mutations for Human Adaptation in Clinical Isolates of Avian H5N1 Influenza Viruses
Source: PubMed Central journal article supplement (PMC4838241; doi:10.1371/journal.ppat.1005583), 2016-04-20
Supplement: ppat.1005583.s016.pdf [file ppat.1005583.s016.pdf]

S3 Table. Summary of the results from various assays in this study.

| Serial No. | Type of mutation                       | Gene (No. of mutations) | Mutation          | Inter-segment combination with mutation | In vitro polymerase activity in: † |               |                             |               | In vitro virus growth in: ‡ |               |              | In vivo virus titers in: * |      |                    |                    |    |    |    |
|------------|----------------------------------------|-------------------------|-------------------|-----------------------------------------|------------------------------------|---------------|-----------------------------|---------------|-----------------------------|---------------|--------------|----------------------------|------|--------------------|--------------------|----|----|----|
|            |                                        |                         |                   |                                         | 293T cells transfected with        |               | QT-6 cells transfected with |               | SAE cells at                |               | CEF cells at | Mouse lungs at             |      |                    |                    |    |    |    |
|            |                                        |                         |                   |                                         | vRNA at 37 °C                      | vRNA at 33 °C | cRNA at 37 °C               | cRNA at 33 °C | vRNA at 37 °C               | cRNA at 37 °C | 37°C         | 33°C                       | 37°C | 3 d post-infection | 6 d post-infection |    |    |    |
| 1          | Single mutations                       | PB2 (14)                | K80R              | Inter-5                                 | =                                  | =             | =                           | +             | =                           | =             | ND           | ND                         | ND   | ND                 | ND                 |    |    |    |
| 2          |                                        |                         | T129N             |                                         | =                                  | =             | =                           | =             | =                           | =             | ND           | ND                         | ND   | ND                 | ND                 | ND |    |    |
| 3          |                                        |                         | D195N             |                                         | =                                  | +             | +                           | +             | =                           | =             | ND           | ND                         | ND   | ND                 | ND                 | ND | ND |    |
| 4          |                                        |                         | Q257L             |                                         | =                                  | =             | =                           | =             | =                           | =             | ND           | ND                         | ND   | ND                 | ND                 | ND | ND |    |
| 5          |                                        |                         | I292M             |                                         | =                                  | =             | =                           | =             | =                           | =             | ND           | ND                         | ND   | ND                 | ND                 | ND | ND |    |
| 6          |                                        |                         | R299K             |                                         | =                                  | =             | =                           | =             | =                           | =             | =            | =                          | =    | =                  | =                  | =  | =  |    |
| 7          |                                        |                         | R389K             |                                         | =                                  | +             | +                           | +             | +                           | +             | +            | +                          | =    | =                  | =                  | =  | =  |    |
| 8          |                                        |                         | N456D             |                                         | =                                  | +             | =                           | +             | +                           | +             | =            | =                          | ND   | ND                 | ND                 | ND | ND |    |
| 9          |                                        |                         | I463M             |                                         | =                                  | =             | =                           | =             | =                           | =             | =            | =                          | =    | =                  | =                  | =  | =  |    |
| 10         |                                        |                         | M473V             |                                         | =                                  | =             | =                           | =             | =                           | =             | =            | =                          | ND   | ND                 | ND                 | ND | ND |    |
| 11         |                                        |                         | M570I             |                                         | =                                  | =             | =                           | =             | =                           | =             | =            | =                          | ND   | ND                 | ND                 | ND | ND |    |
| 12         |                                        |                         | K617E             |                                         | =                                  | =             | =                           | =             | =                           | =             | =            | =                          | ND   | ND                 | ND                 | ND | ND |    |
| 13         |                                        |                         | T637I             |                                         | =                                  | =             | =                           | =             | =                           | =             | =            | =                          | ND   | ND                 | ND                 | ND | ND |    |
| 14         |                                        |                         | T683I             |                                         | =                                  | =             | =                           | =             | =                           | =             | =            | =                          | ND   | ND                 | ND                 | ND | ND |    |
| 15         |                                        | K54R                    | =                 | =                                       | =                                  | +             | +                           | =             | =                           | =             | ND           | ND                         | ND   | ND                 | ND                 |    |    |    |
| 16         |                                        | D175N                   | =                 | =                                       | =                                  | =             | =                           | =             | =                           | =             | ND           | ND                         | ND   | ND                 | ND                 |    |    |    |
| 17         |                                        | T182I                   | =                 | =                                       | =                                  | +++           | ++                          | +             | =                           | +             | +            | +                          | +    | +                  | +                  | +  |    |    |
| 18         |                                        | K198R                   | =                 | =                                       | =                                  | +++           | ++                          | +             | =                           | +             | +            | +                          | +    | +                  | +                  | +  |    |    |
| 19         |                                        | K214R                   | =                 | =                                       | =                                  | =             | =                           | =             | =                           | =             | ND           | ND                         | ND   | ND                 | ND                 | ND |    |    |
| 20         |                                        | A374T                   | =                 | =                                       | =                                  | =             | =                           | =             | =                           | =             | ND           | ND                         | ND   | ND                 | ND                 | ND |    |    |
| 21         |                                        | L384S                   | =                 | =                                       | =                                  | +             | =                           | =             | =                           | +             | ND           | ND                         | ND   | ND                 | ND                 | ND |    |    |
| 22         |                                        | K386R                   | =                 | =                                       | =                                  | +             | =                           | =             | =                           | =             | ND           | ND                         | ND   | ND                 | ND                 | ND |    |    |
| 23         |                                        | M616R                   | =                 | =                                       | =                                  | =             | =                           | =             | =                           | =             | ND           | ND                         | ND   | ND                 | ND                 | ND |    |    |
| 24         |                                        | E618D                   | =                 | =                                       | =                                  | =             | =                           | =             | =                           | =             | ND           | ND                         | ND   | ND                 | ND                 | ND |    |    |
| 25         |                                        | P627L                   | =                 | =                                       | =                                  | +++           | =                           | +++           | =                           | =             | =            | ++                         | =    | =                  | =                  | =  |    |    |
| 26         |                                        | N642K                   | =                 | =                                       | =                                  | =             | =                           | =             | =                           | =             | ND           | ND                         | ND   | ND                 | ND                 | ND |    |    |
| 27         |                                        | P756S                   | =                 | =                                       | =                                  | =             | =                           | =             | =                           | =             | ND           | ND                         | ND   | ND                 | ND                 | ND |    |    |
| 28         |                                        | D55N                    | =                 | =                                       | =                                  | =             | =                           | =             | =                           | =             | ND           | ND                         | ND   | ND                 | ND                 | ND |    |    |
| 29         |                                        | N321S                   | =                 | =                                       | =                                  | =             | =                           | =             | =                           | =             | ND           | ND                         | ND   | ND                 | ND                 | ND |    |    |
| 30         |                                        | N321I                   | =                 | =                                       | =                                  | =             | =                           | =             | =                           | =             | =            | =                          | =    | =                  | =                  | =  |    |    |
| 31         |                                        | E327K                   | =                 | =                                       | =                                  | +             | +                           | ++            | =                           | =             | =            | =                          | =    | =                  | =                  | =  |    |    |
| 32         |                                        | V341L                   | =                 | =                                       | =                                  | =             | =                           | +             | =                           | =             | =            | =                          | =    | =                  | =                  | =  |    |    |
| 33         |                                        | E382D                   | =                 | =                                       | =                                  | =             | =                           | =             | =                           | =             | ND           | ND                         | ND   | ND                 | ND                 | ND |    |    |
| 34         |                                        | S400T                   | =                 | =                                       | =                                  | =             | =                           | =             | =                           | =             | ND           | ND                         | ND   | ND                 | ND                 | ND |    |    |
| 35         |                                        | T608S                   | =                 | =                                       | =                                  | =             | =                           | =             | =                           | =             | ND           | ND                         | ND   | ND                 | ND                 | ND |    |    |
| 36         |                                        | K615R                   | =                 | =                                       | =                                  | =             | =                           | =             | =                           | =             | ND           | ND                         | ND   | ND                 | ND                 | ND |    |    |
| 37         |                                        | E629H                   | =                 | =                                       | =                                  | =             | =                           | =             | =                           | =             | ND           | ND                         | ND   | ND                 | ND                 | ND |    |    |
| 38         |                                        | G631C                   | =                 | =                                       | =                                  | =             | =                           | =             | =                           | =             | ND           | ND                         | ND   | ND                 | ND                 | ND |    |    |
| 39         |                                        | L641P                   | =                 | =                                       | =                                  | =             | =                           | =             | =                           | =             | ND           | ND                         | ND   | ND                 | ND                 | ND |    |    |
| 40         |                                        | S644F                   | =                 | =                                       | =                                  | =             | =                           | =             | =                           | =             | ND           | ND                         | ND   | ND                 | ND                 | ND |    |    |
| 41         |                                        | L649I                   | =                 | =                                       | =                                  | +             | =                           | =             | =                           | =             | ND           | ND                         | ND   | ND                 | ND                 | ND |    |    |
| 42         |                                        | A669V                   | =                 | =                                       | =                                  | +             | +                           | =             | =                           | =             | ND           | ND                         | ND   | ND                 | ND                 | ND |    |    |
| 43         |                                        | F681L                   | =                 | =                                       | =                                  | =             | =                           | =             | =                           | =             | ND           | ND                         | ND   | ND                 | ND                 | ND |    |    |
| 44         |                                        | K716N                   | =                 | =                                       | =                                  | =             | =                           | =             | =                           | =             | ND           | ND                         | ND   | ND                 | ND                 | ND |    |    |
| 45         |                                        | G287S                   | =                 | =                                       | =                                  | =             | =                           | =             | =                           | =             | =            | =                          | =    | =                  | =                  | =  |    |    |
| 46         |                                        | T371M                   | =                 | =                                       | =                                  | =             | =                           | =             | =                           | =             | ND           | ND                         | ND   | ND                 | ND                 | ND |    |    |
| 47         | Intra-segment combinations             | PB2(8)                  | D195N/R299K       | Inter-2,7                               | =                                  | +             | +                           | +             | =                           | =             | ND           | ND                         | ND   | ND                 | ND                 |    |    |    |
| 48         |                                        |                         | D195N/R299K/N456D |                                         | =                                  | +             | +                           | ++            | ++                          | =             | =            | =                          | =    | =                  | =                  | =  | =  |    |
| 49         |                                        |                         | M473V/D195N       |                                         | =                                  | =             | =                           | =             | +                           | =             | =            | =                          | +    | +                  | =                  | =  | =  |    |
| 50         |                                        |                         | M473V/D195N/T683I |                                         | =                                  | =             | =                           | =             | =                           | =             | =            | =                          | ND   | ND                 | ND                 | ND | ND |    |
| 51         |                                        | M473V/N456D             | =                 | =                                       | =                                  | +             | +                           | =             | =                           | =             | ND           | ND                         | ND   | ND                 | ND                 | ND |    |    |
| 52         |                                        | M570I/K80R              | =                 | =                                       | =                                  | +             | +                           | =             | =                           | =             | =            | =                          | =    | =                  | =                  | =  |    |    |
| 53         |                                        | M570I/K80R/T129N        | =                 | =                                       | =                                  | =             | =                           | =             | =                           | =             | ND           | ND                         | ND   | ND                 | ND                 | ND |    |    |
| 54         |                                        | M570I/K80R/T129N/I292M  | =                 | =                                       | =                                  | =             | =                           | =             | =                           | =             | ND           | ND                         | ND   | ND                 | ND                 | ND |    |    |
| 55         |                                        | T182I/K214R             | =                 | =                                       | =                                  | +             | =                           | ++            | +                           | =             | =            | =                          | =    | =                  | =                  | =  |    |    |
| 56         |                                        | T182I/K214R/L384S       | =                 | =                                       | =                                  | +             | =                           | +++           | ++                          | +             | +            | +                          | +    | +                  | +                  | +  |    |    |
| 57         |                                        | K198R/D175N             | =                 | =                                       | =                                  | +             | =                           | +++           | ++                          | +             | +            | +                          | +    | +                  | +                  | +  |    |    |
| 58         |                                        | A374T/K54R              | =                 | =                                       | =                                  | +             | =                           | +             | ++                          | =             | ND           | ND                         | ND   | ND                 | ND                 | ND |    |    |
| 59         |                                        | P756S/P627L             | =                 | =                                       | =                                  | +             | +++                         | +             | ++                          | =             | ND           | ND                         | ND   | ND                 | ND                 | ND |    |    |
| 60         |                                        | P756S/P627L/E618D       | =                 | =                                       | =                                  | +             | +++                         | +             | +++                         | =             | ND           | ND                         | ND   | ND                 | ND                 | ND |    |    |
| 61         |                                        | P756S/P627L/E618D/K386R | =                 | =                                       | =                                  | +++           | +++                         | ++            | ++                          | =             | =            | =                          | =    | =                  | =                  | =  |    |    |
| 62         |                                        | N321S/K716N             | =                 | =                                       | =                                  | =             | =                           | =             | =                           | =             | =            | =                          | =    | =                  | =                  | =  |    |    |
| 63         |                                        | N321S/K716N/S400T       | =                 | =                                       | =                                  | =             | =                           | =             | =                           | =             | ND           | ND                         | ND   | ND                 | ND                 | ND |    |    |
| 64         |                                        | N321S/K716N/S400T/K615R | =                 | =                                       | =                                  | =             | =                           | =             | =                           | =             | ND           | ND                         | ND   | ND                 | ND                 | ND |    |    |
| 65         | G631C/E629H                            | =                       | =                 | =                                       | =                                  | =             | =                           | =             | =                           | ND            | ND           | ND                         | ND   | ND                 | ND                 |    |    |    |
| 66         | G631C/E629H/A669V                      | =                       | =                 | =                                       | =                                  | =             | =                           | =             | =                           | ND            | ND           | ND                         | ND   | ND                 | ND                 |    |    |    |
| 67         | A669V/L649I                            | =                       | =                 | =                                       | =                                  | =             | +                           | =             | =                           | =             | =            | =                          | =    | =                  | =                  |    |    |    |
| 68         | A669V/E382D                            | =                       | =                 | =                                       | =                                  | =             | =                           | =             | =                           | =             | =            | =                          | =    | =                  | =                  |    |    |    |
| 69         | G287S/T371M                            | =                       | =                 | =                                       | =                                  | =             | =                           | =             | =                           | =             | =            | =                          | =    | =                  | =                  |    |    |    |
| 70         | Inter-segment combination of mutations | Intersegment(16)        | Inter-1           | Inter-2,7                               | +                                  | +             | +++                         | +++           | +                           | +             | ++           | +++                        | +    | +                  | +                  | +  |    |    |
| 71         |                                        |                         | Inter-2           |                                         | +                                  | +             | +++                         | +++           | +                           | +             | +            | +                          | ++   | +++                | +                  | +  | +  | +  |
| 72         |                                        |                         | Inter-3           |                                         | +                                  | +             | +++                         | +++           | +                           | +             | +            | +                          | +    | ++                 | +                  | +  | +  | +  |
| 73         |                                        |                         | Inter-4           |                                         | +                                  | +             | +++                         | +++           | +                           | +             | +            | +                          | ++   | +++                | +                  | +  | +  | +  |
| 74         |                                        |                         | Inter-5           |                                         | +                                  | +             | +++                         | ++            | +                           | +             | +            | +                          | +    | ++                 | +                  | +  | +  | +  |
| 75         |                                        |                         | Inter-6           |                                         | +                                  | +             | +++                         | +++           | +                           | +             | ++           | +                          | +    | +                  | +                  | +  | +  | +  |
| 76         |                                        |                         | Inter-7           |                                         | +                                  | +             | +++                         | +++           | +                           | +             | +            | +                          | +    | +                  | +                  | +  | +  | +  |
| 77         |                                        |                         | Inter-8           |                                         | +                                  | +             | +++                         | ++            | +                           | +             | ++           | +                          | +    | +                  | +                  | +  | +  | +  |
| 78         |                                        |                         | Inter-9           |                                         | =                                  | =             | =                           | =             | =                           | =             | =            | =                          | =    | =                  | =                  | =  | =  | =  |
| 79         |                                        |                         | Inter-10          |                                         | +                                  | +             | ++                          | ++            | +                           | +             | +            | +                          | ND   | ND                 | ND                 | ND | ND | ND |
| 80         |                                        |                         | Inter-11          |                                         | +                                  | +             | ++                          | ++            | +                           | +             | +            | +                          | ND   | ND                 | ND                 | ND | ND | ND |
| 81         |                                        |                         | Inter-12          |                                         | =                                  | =             | =                           | =             | =                           | =             | =            | =                          | ND   | ND                 | ND                 | ND | ND | ND |
| 82         |                                        |                         | Inter-13          |                                         | +                                  | +             | ++                          | ++            | +                           | +             | +            | +                          | ND   | ND                 | ND                 | ND | ND | ND |
| 83         |                                        |                         | Inter-14          |                                         | +                                  | +             | +                           | +             | +                           | +             | +            | +                          | ND   | ND                 | ND                 | ND | ND | ND |
| 84         |                                        |                         | Inter-15          |                                         | =                                  | =             | =                           | =             | =                           | =             | =            | =                          | ND   | ND                 | ND                 | ND | ND | ND |
| 85         |                                        |                         | Inter-16          |                                         | =                                  | =             | =                           | =             | =                           | +             | =            | =                          | ND   | ND                 | ND                 | ND | ND | ND |

†Relative comparison with wild-type polymerase activity: +, 1.5-3-fold increase; ++, 3-5-fold increase; +++, >5-fold increase; =, similar to wild-type virus (<1.5-fold change); -, lower than wild-type.

‡Relative comparison with wild-type virus yield: +, 2-5-fold increase; ++, >5-10-fold increase; +++, >10-fold increase; =, similar to wild-type virus (<2-fold change); -, lower than wild-type.

\*Relative comparison with wild-type virus titer: +, 2-10-fold increase; ++, >10-100-fold increase; +++, >100-fold increase; =, similar to wild-type virus (<2-fold change); -, lower than wild-type.

† ND: not determined.
