# Supplementary material for: Novel Polymerase Gene Mutations for Human Adaptation in Clinical Isolates of Avian H5N1 Influenza Viruses
Source: PubMed Central journal article supplement (PMC4838241; doi:10.1371/journal.ppat.1005583), 2016-04-20
Supplement: ppat.1005583.s017.pdf [file ppat.1005583.s017.pdf]

**S4 Table. Interaction energy between the vRNA promoter and vRNA contact residues in EG/D1 (wt) PB1 and PB1 mutants.**

| Mutation   | IntE (kcal/mol) between vRNA promoter and vRNA contact residues in PB1 $\beta$ -ribbon ( $\Delta E$ ) <sup>a</sup> |                | IntE (kcal/mol) between vRNA promoter and trimeric polymerase complex( $\Delta E$ ) <sup>b</sup> |
|------------|--------------------------------------------------------------------------------------------------------------------|----------------|--------------------------------------------------------------------------------------------------|
|            | 188                                                                                                                | 203            |                                                                                                  |
| EG/D1 (Wt) | -85.71                                                                                                             | -48.73         | -1098.29                                                                                         |
| PB1-T182I  | -51.92 (33.79)                                                                                                     | -35.21 (13.52) | -1230.78 (-132.49)                                                                               |
| PB1-K214R  | -56.53 (29.18)                                                                                                     | -27.37 (21.36) | -1175.62 (-77.33)                                                                                |

<sup>a</sup>The interaction energy, IntE, was calculated between the vRNA promoter and the PB1 contact residues for the EG/D1 (wt) and mutant polymerases.  $\Delta E$  was the IntE difference between the mutant and EG/D1 residues.

<sup>b</sup>IntE was calculated between the vRNA promoter and the trimeric polymerase complexes for EG/D1 (wt) and the PB1 mutants.  $\Delta E$  was the IntE difference between the mutant and EG/D1 trimeric polymerase complexes.
